# Supplementary material for: Modeling the Differentiation of Embryonic Limb Chondroprogenitors by Cell Death and Cell Senescence in High Density Micromass Cultures and Their Regulation by FGF Signaling
Source: MDPI journal article supplement (doi:10.3390/cells12010175), 2022-12-31
Supplement: s1 [file s1]

**Table S1:** qPCR and MSRE-qPCR chicken specific primers.

| qPCR Primers         |                |                       |                        |
|----------------------|----------------|-----------------------|------------------------|
| Gene                 | NCBI Ref. Seq. | Fwd Primer            | Rev Primer             |
| <i>Ch. Bak1</i>      | NM_001030920   | ctacgtcaccgaattcatgc  | aacattgtccagatcgagtgc  |
| <i>Ch. Bcl2</i>      | NM_205339      | ttgtacggcaacagtatgagg | ataagcgccaagagtgatgc   |
| <i>Ch. BMP2</i>      | NM_204358      | tggaatgactggattgttgc  | tggaattcaccgaattgacc   |
| <i>Ch. BMP4</i>      | NM_205237      | agagcctccaggagatcagc  | gctgaggttgaagacgaagc   |
| <i>Ch. BMP5</i>      | NM_205148      | cagcgaaggcactacaagg   | gctgctgtcactgcttctcc   |
| <i>Ch. BMP7</i>      | XM_417496      | aagcacgagctctatgtcagc | cacagtaatacgcagcatagcc |
| <i>Ch. CTSD</i>      | NM_205177      | tatggtagattggcattgg   | gatgtctagcaggtgacagtgc |
| <i>Ch. Dkk1</i>      | XM_040702954   | cggaactcggcactgacc    | tcttgaccagaagtggcg     |
| <i>Ch. DNMT1</i>     | NM_206952      | cgagttcctgcagaacaacc  | gagcgaatcctctgtgaagc   |
| <i>Ch. DNMT3a</i>    | NM_001024832   | gcaggatagccaagttcagc  | cacaggatgtcttccttctcg  |
| <i>Ch. DNMT3b</i>    | NM_001024828   | caagaggctgaagagcaacc  | cgctgtgttcgtaacttcg    |
| <i>Ch. FGFR1</i>     | NM_205510      | ggtaggtgccatcagataagg | ctggtaggtgtggttgatgc   |
| <i>Ch. FGFR2</i>     | NM_205319      | caagctcctccatgaactcc  | ggcagttcatattccgagacc  |
| <i>Ch. FGFR3</i>     | NM_205509      | ggcgggcagaataacttgagg | ctgttgaagggtgcaatcc    |
| <i>Ch. FGFR4</i>     | XM_025154976   | cgagctgtacatgctgatgc  | cagggtactcctccgagatgg  |
| <i>Ch. Gapdh</i>     | NM_204305      | ggtagccatcaatgatcc    | gttctcagccttgacagtgc   |
| <i>Ch. GLB1</i>      | NM_001278147   | tgtcacagcagcattcttagc | acaacaatgtgacgggtgcc   |
| <i>Ch. HDAC2</i>     | NM_204831      | tgatattgtgcttgccatcc  | gcttcttcaacaccatcacc   |
| <i>Ch. HDAC3</i>     | NM_204747      | tgcctctacgagatggtatcg | gagaatctgcaccacactgc   |
| <i>Ch. HDAC8</i>     | XM_004940604   | cacaagttttgccaggatt   | gccatcttgataggcacat    |
| <i>Ch. IL6</i>       | NM_204628      | gcaagaagttcaccgtgtgc  | ggcaggttgaggttgtcc     |
| <i>Ch. MMP2</i>      | NM_204420      | atgatgatgaccgcaagtgg  | tcctcggagtgtctaatcc    |
| <i>Ch. MSX1</i>      | NM_205488      | caagcacaagaccaacagga  | tactgtctctggcggaattt   |
| <i>Ch. MSX2</i>      | NM_204559      | ctctgaggaagcacaagacg  | tggacaggtactgtcttgg    |
| <i>Ch. Noggin</i>    | NM_204123      | ccagcactacctgcacatcc  | ggctccttagcaaggctctcg  |
| <i>Ch. Oct4</i>      | NM_001110178   | ggtagctcagaccattcacc  | cttgtgcttgaggctcttgg   |
| <i>Ch. p21</i>       | NM_204396      | cgtagaccacgagcagatcc  | cgctcgggtctcgaagtgg    |
| <i>Ch. PRMT5</i>     | NM_001320230   | gcagtacctggagcatgtgg  | actccaggtgtccatcagg    |
| <i>Ch. Scleraxis</i> | NM_204253      | caccaacagcgtcaacacc   | cgctcgcgatcttgacagc    |
| <i>Ch. Sox9</i>      | NM_204281      | gaggaagtcggtgaagaacg  | gatgctggaggatgactgc    |
| <i>Ch. SPRY1</i>     | NM_001097524   | gccttgctgtctgttacc    | gtgttgaggttcttgcacg    |
| <i>Ch. TET3</i>      | XM_015297468   | aagaggagaagctgctgtgc  | gctcctggtacagtgtgtcg   |
| <i>Ch. Wnt5a</i>     | NM_204887      | ggtagcagcagttcaagacg  | tgggtccacgatctctgtgc   |
| MSRE-qPCR Primers    |                |                       |                        |
| Gene                 | CpG Island     | Fwd Primer            | Rev Primer             |
| <i>Ch. Sox9</i>      | CpG: 373       | gtctctgccggtttacttct  | atcaggggaggagaaaacgga  |
| <i>Ch. Sox9</i>      | CpG: 373       | atcttgcctcggaggagtcg  | gagattcatgcgagaaagcgg  |
| <i>Ch. Scleraxis</i> | CpG: 138       | ctgtaccccagatcagcat   | ggtgttgacgctgttgggtg   |
| <i>Ch. Scleraxis</i> | CpG: 138       | acagagcggacgtttggg    | cgtagcgggtgctaattggggc |
